# Supplementary material for: Design, Synthesis, Biological Evaluation and Molecular Docking of Novel F-18-Labeled Focal Adhesion Kinase Inhibitors as Potential Tumor Radiotracers
Source: MDPI journal article supplement (doi:10.3390/molecules29061224), 2024-03-08
Supplement: s1 [file s1]

# Design, Synthesis, Biological Evaluation and Molecular Docking of Novel F-18 labeled Focal Adhesion Kinase Inhibitors as Potential Tumor Radiotracers

Hailong Yang, Ye Li, Huaju Liang, Chun Cui, Lu Gan and Huabei Zhang \*

Key Laboratory of Radiopharmaceuticals of Ministry of Education, College of Chemistry, Beijing Normal University, No. 19 Xijiekouwai Street, Haidian District, Beijing 100875, China.

\* Correspondence: hbzhang@bnu.edu.cn.

## Supporting information

NMR and Ms spectra of **7a-7g** .....S1-S21

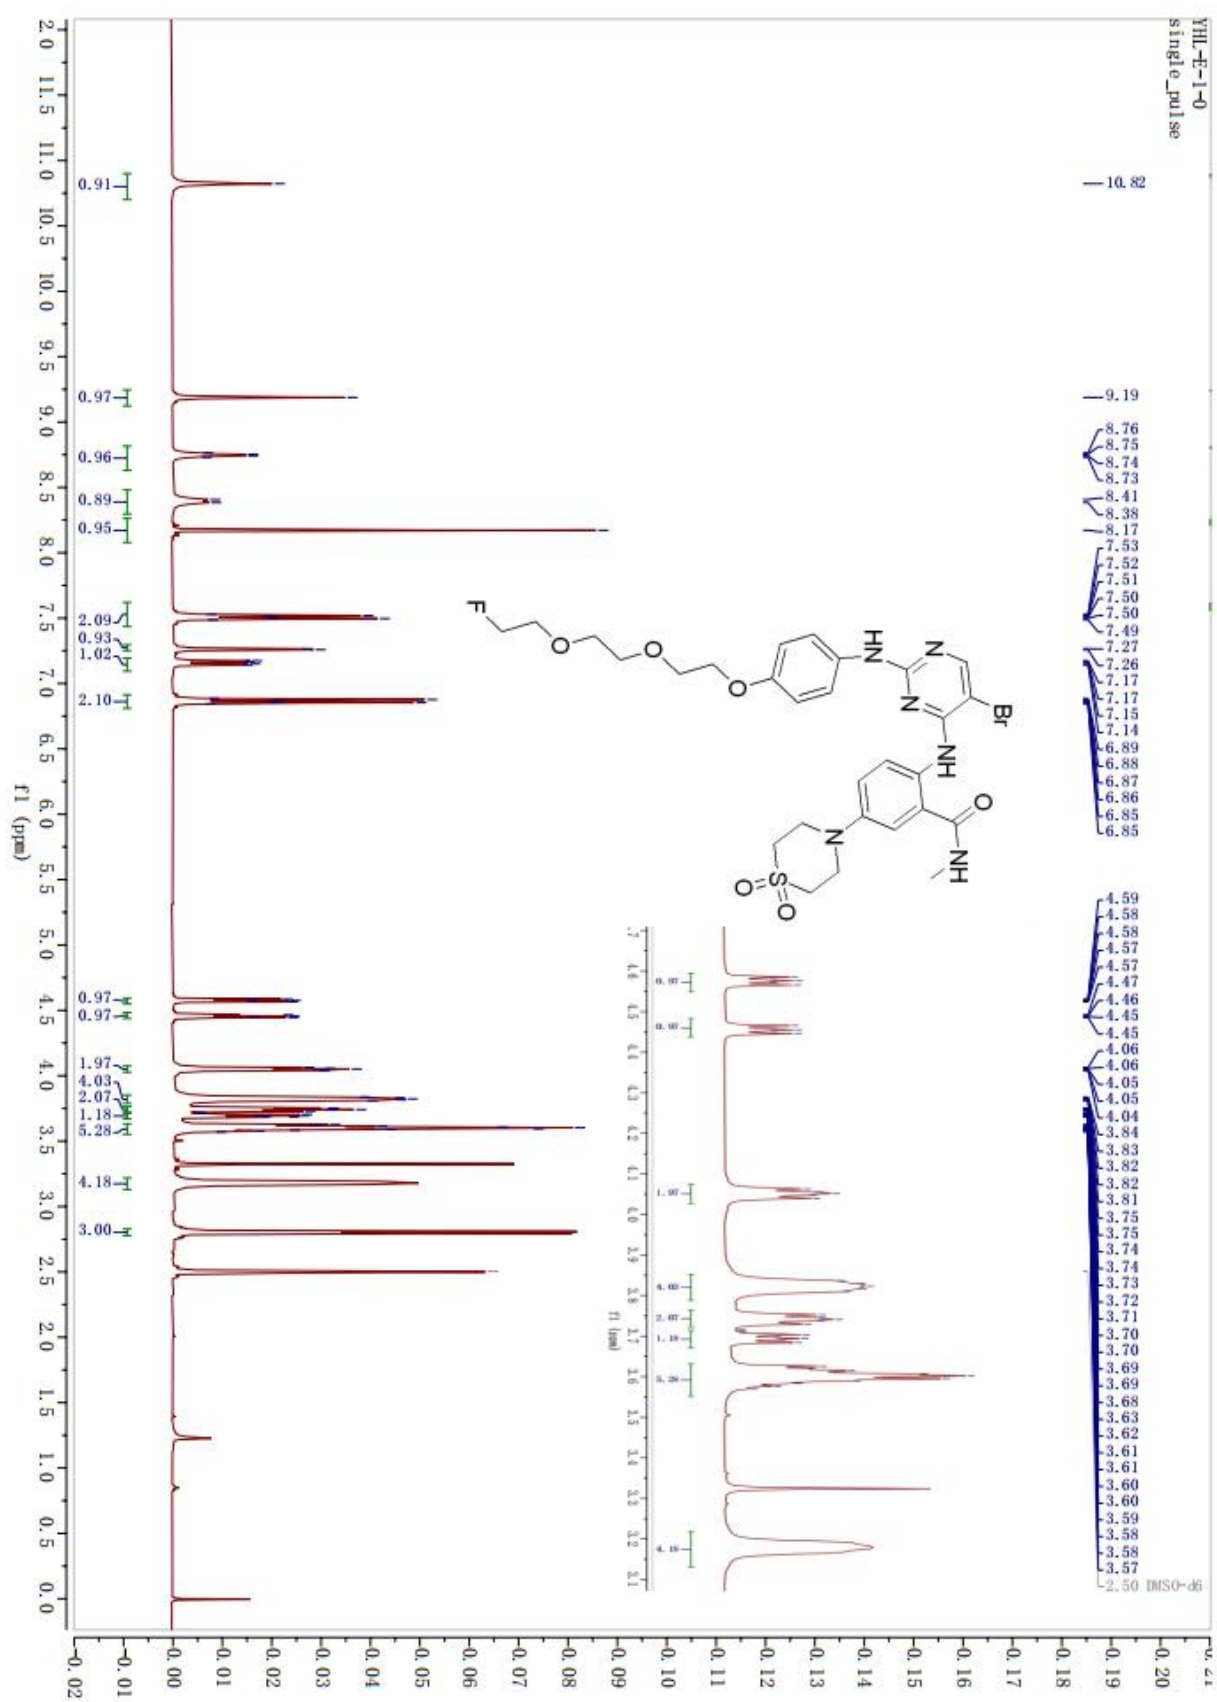

Figure S1  $^1\text{H}$  NMR spectrum of 7a



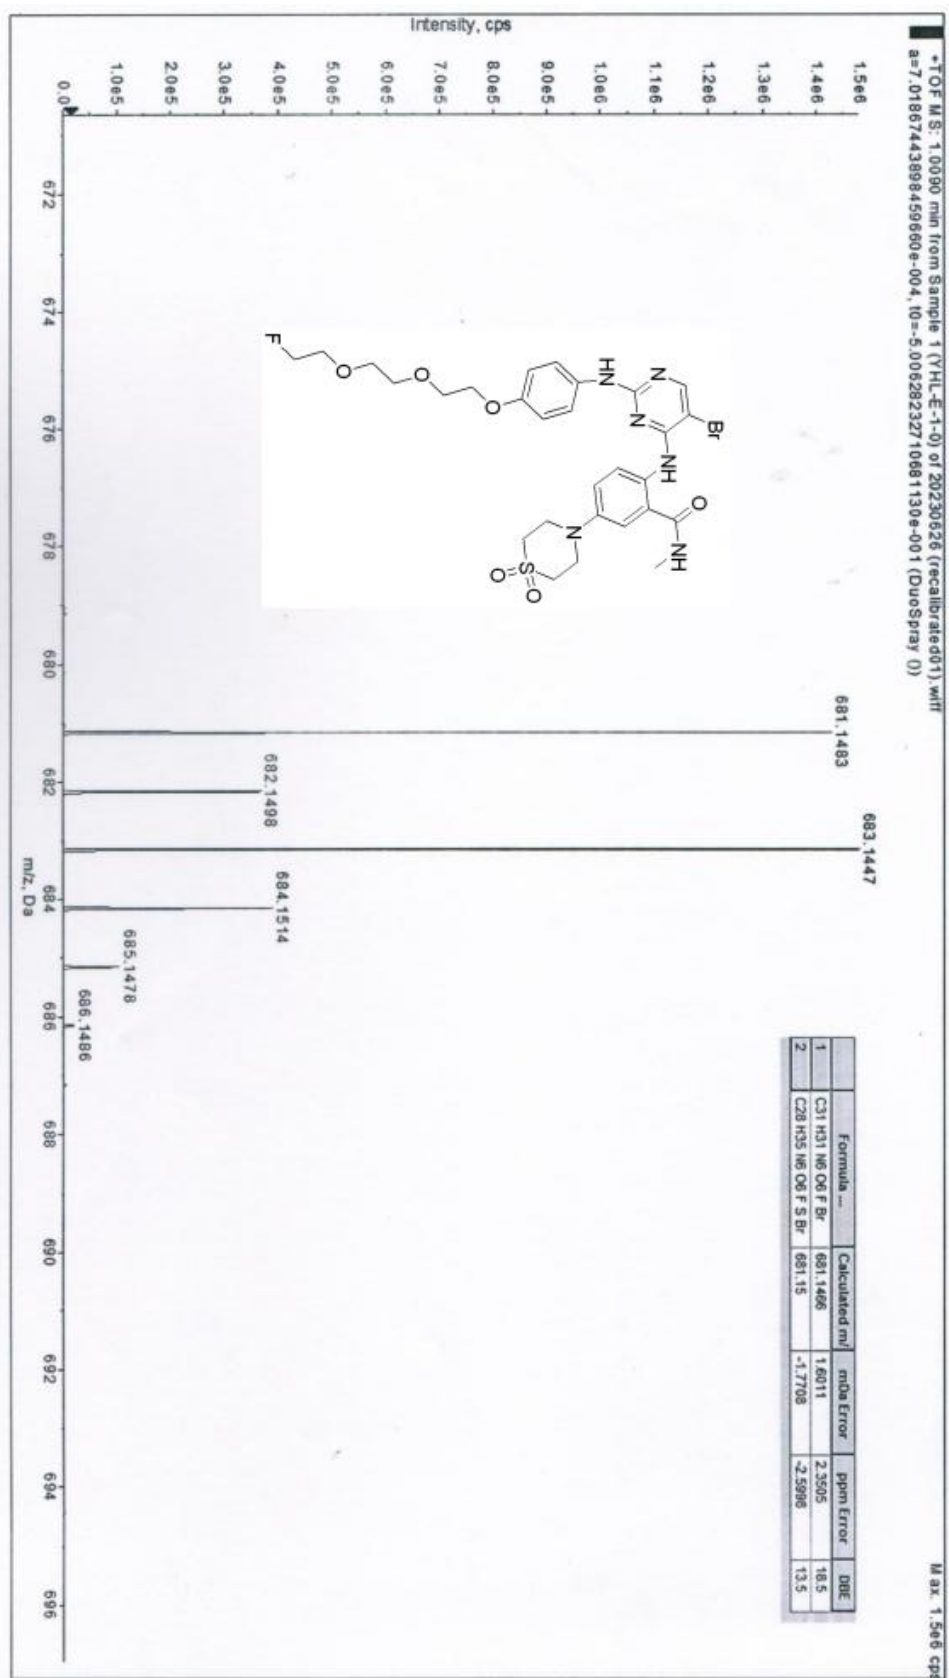

Figure S3 ESI-HRMS spectrum of 7a

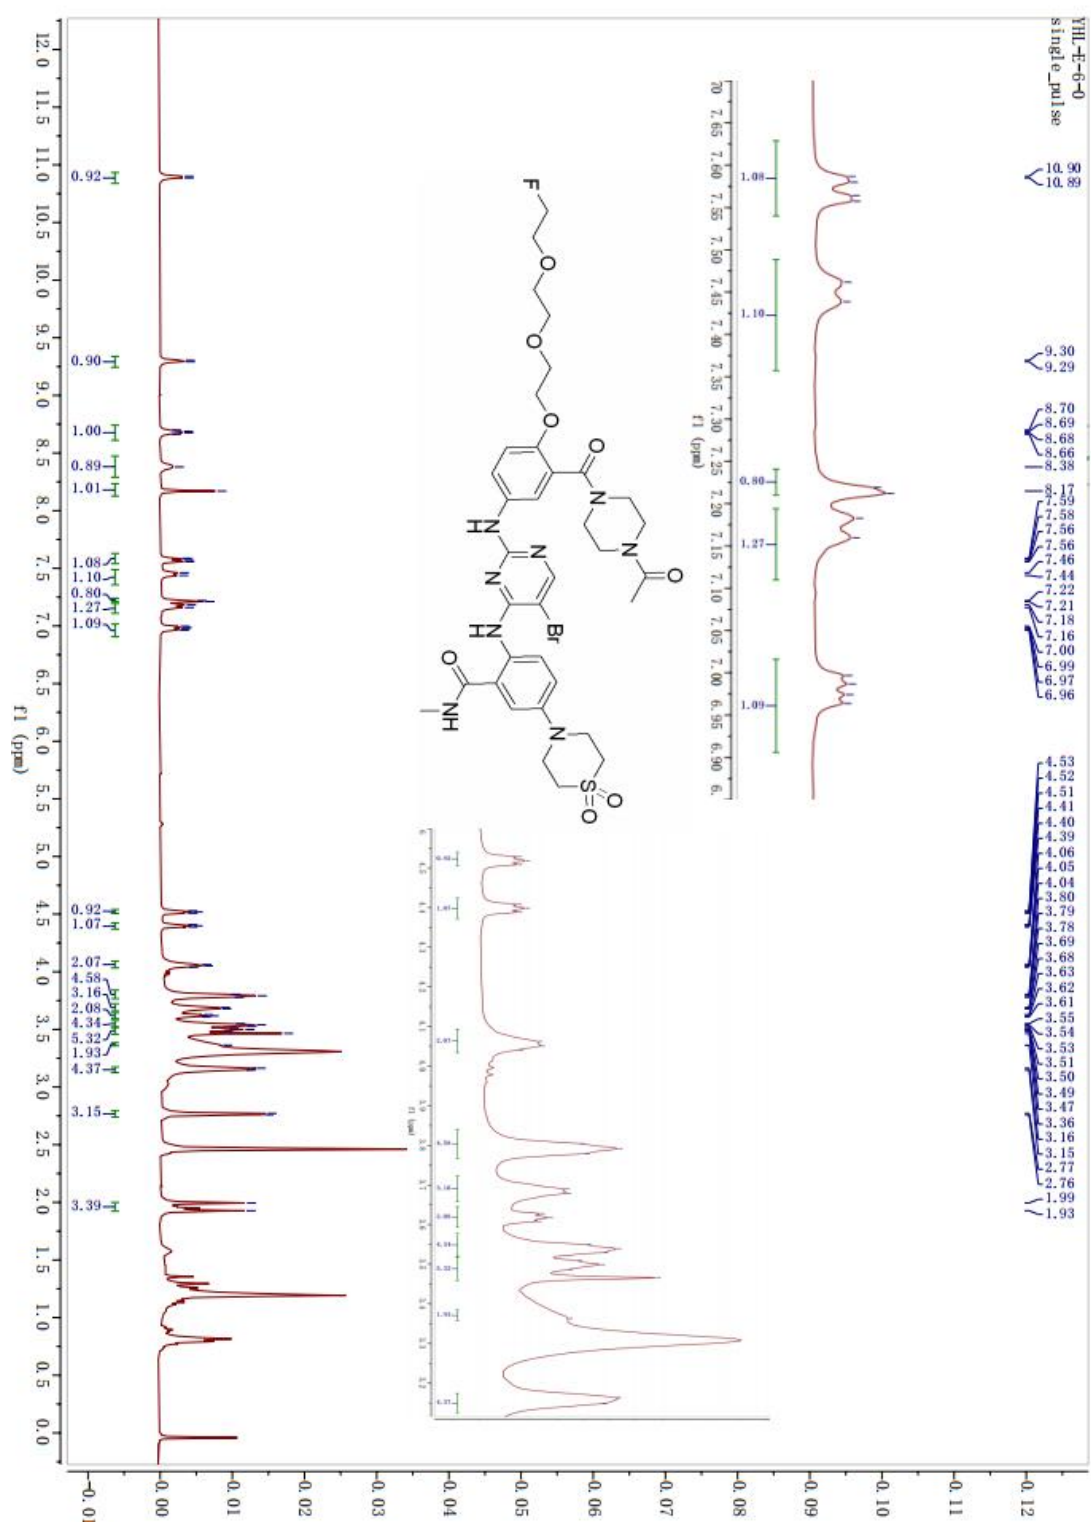

Figure S4 <sup>1</sup>H NMR spectrum of **7b**

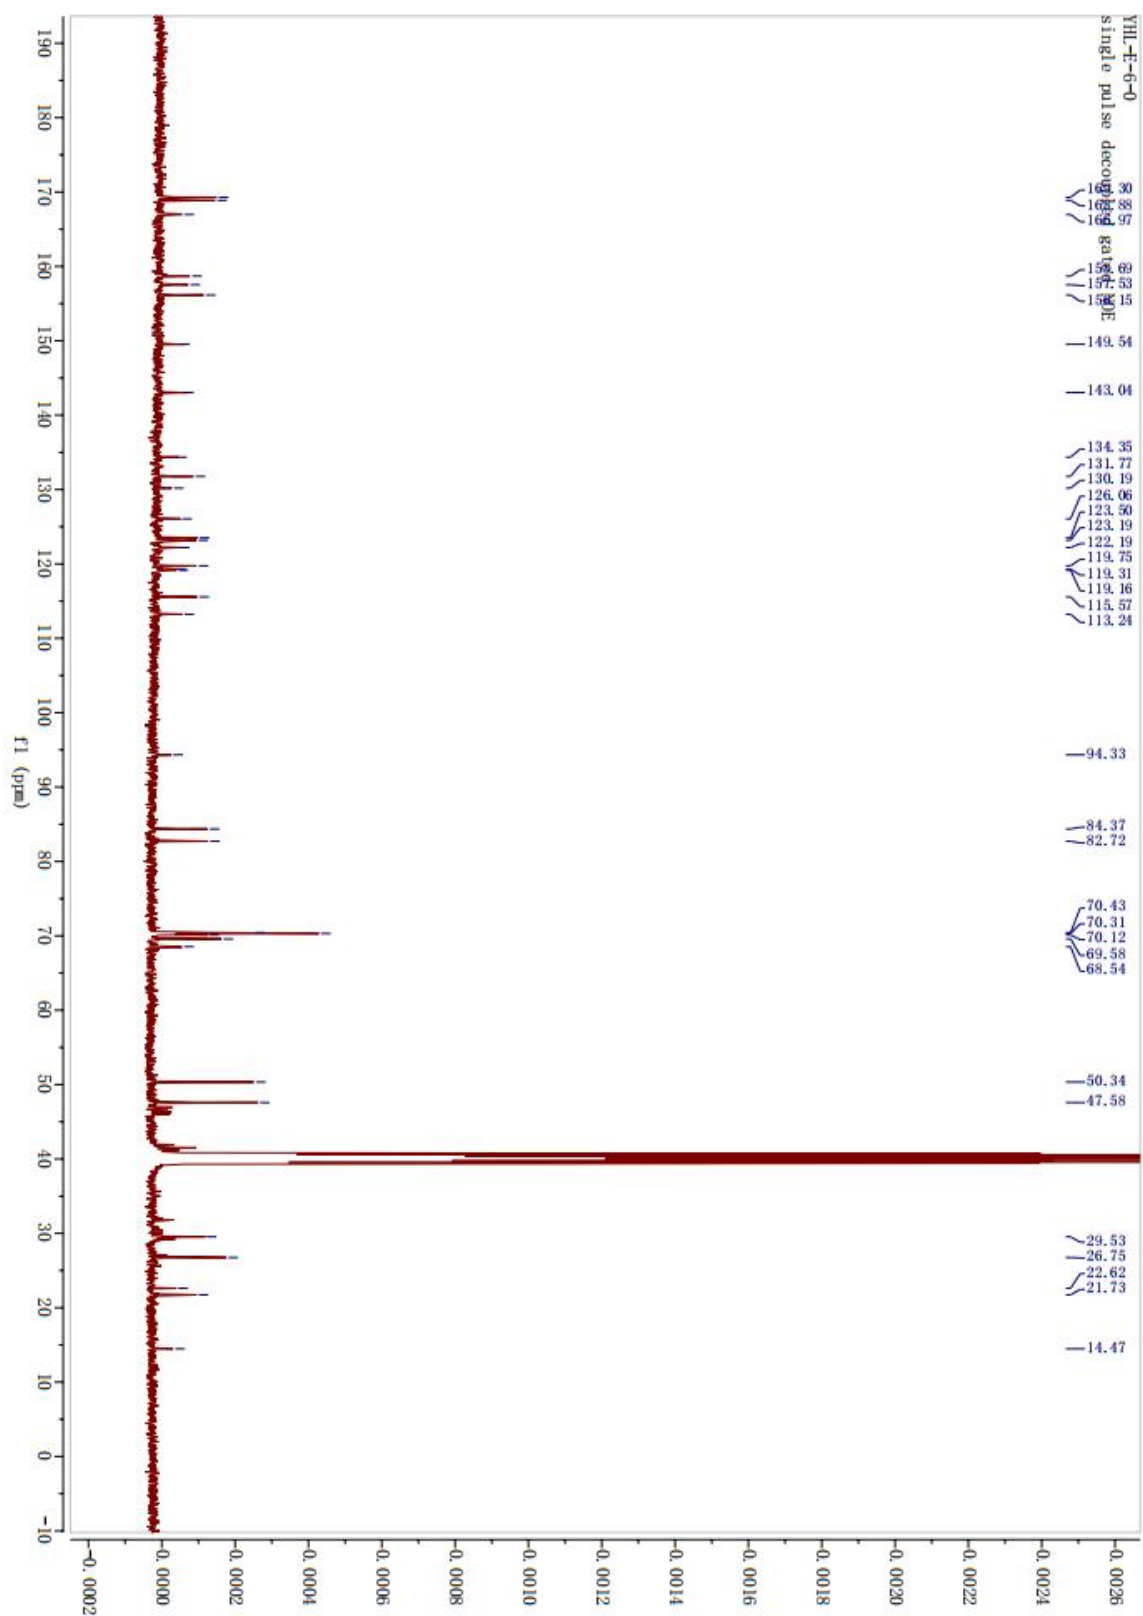

Figure S5  $^{13}\text{C}$  NMR spectrum of **7b**

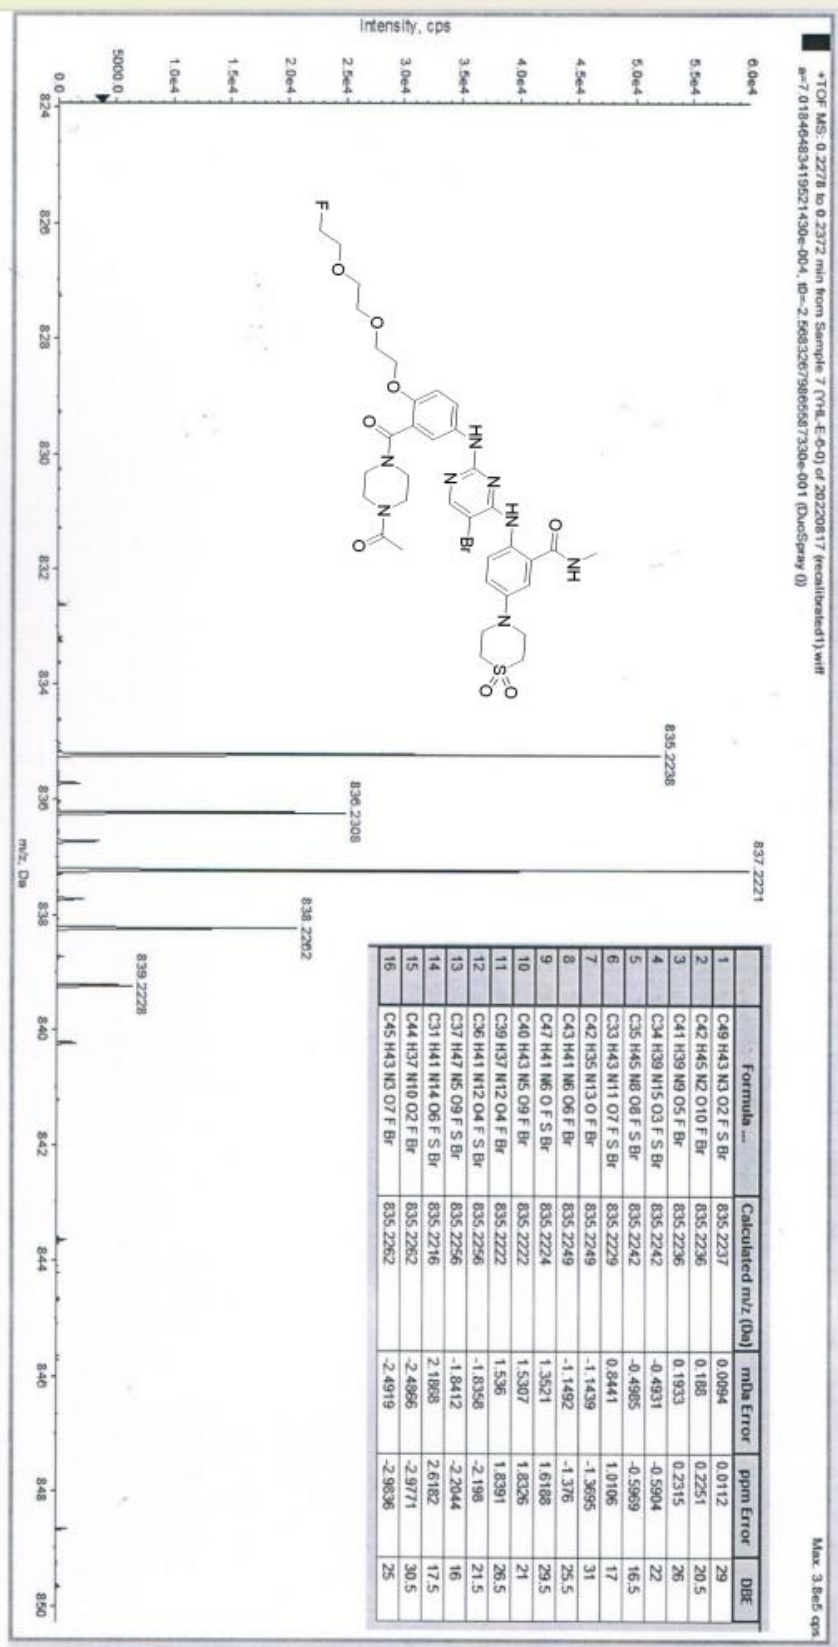

Figure S6 ESI-HRMS spectrum of 7b







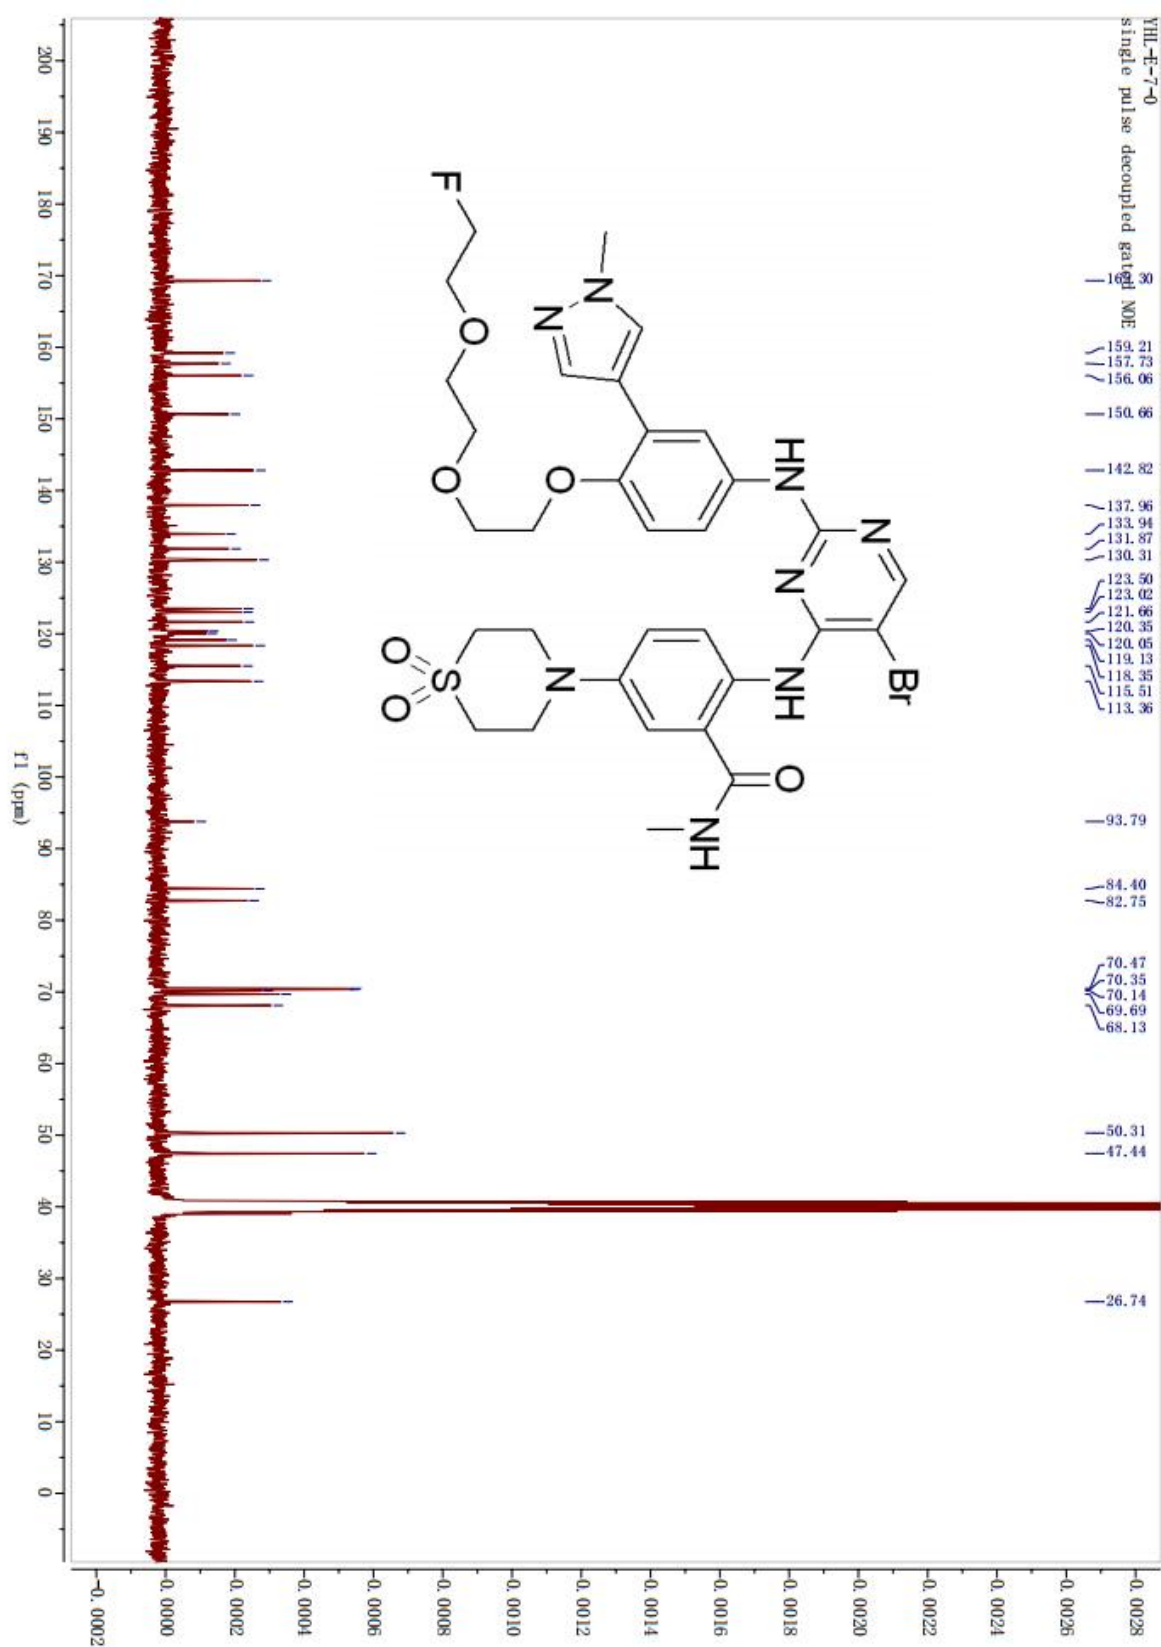

Figure S8  $^{13}\text{C}$  NMR spectrum of 7c

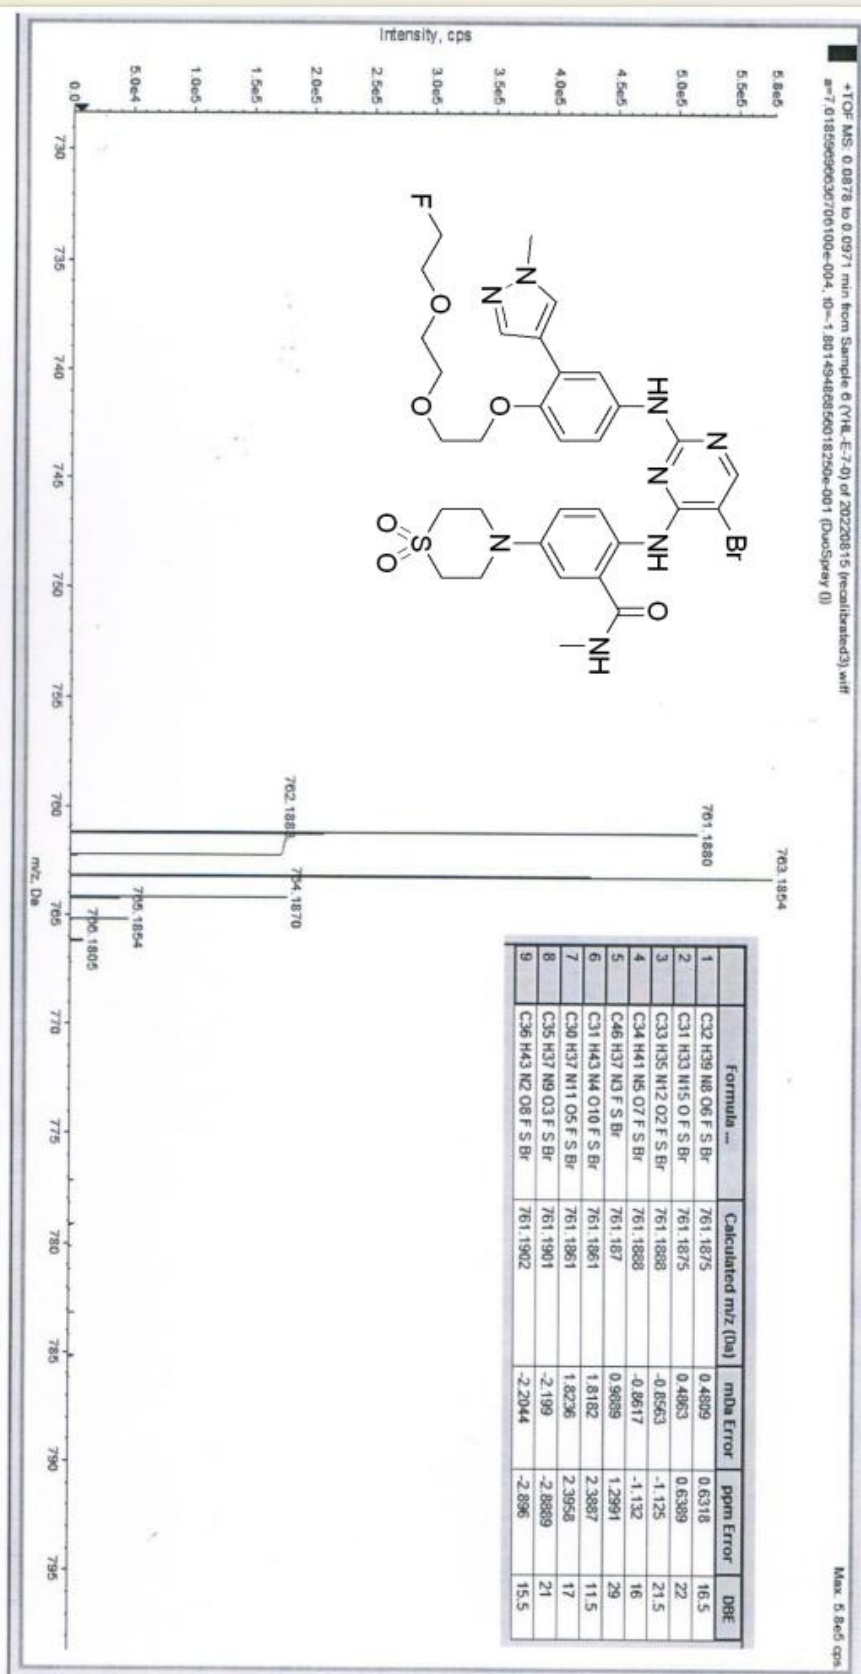

Figure S9 ESI-HRMS spectrum of 7c

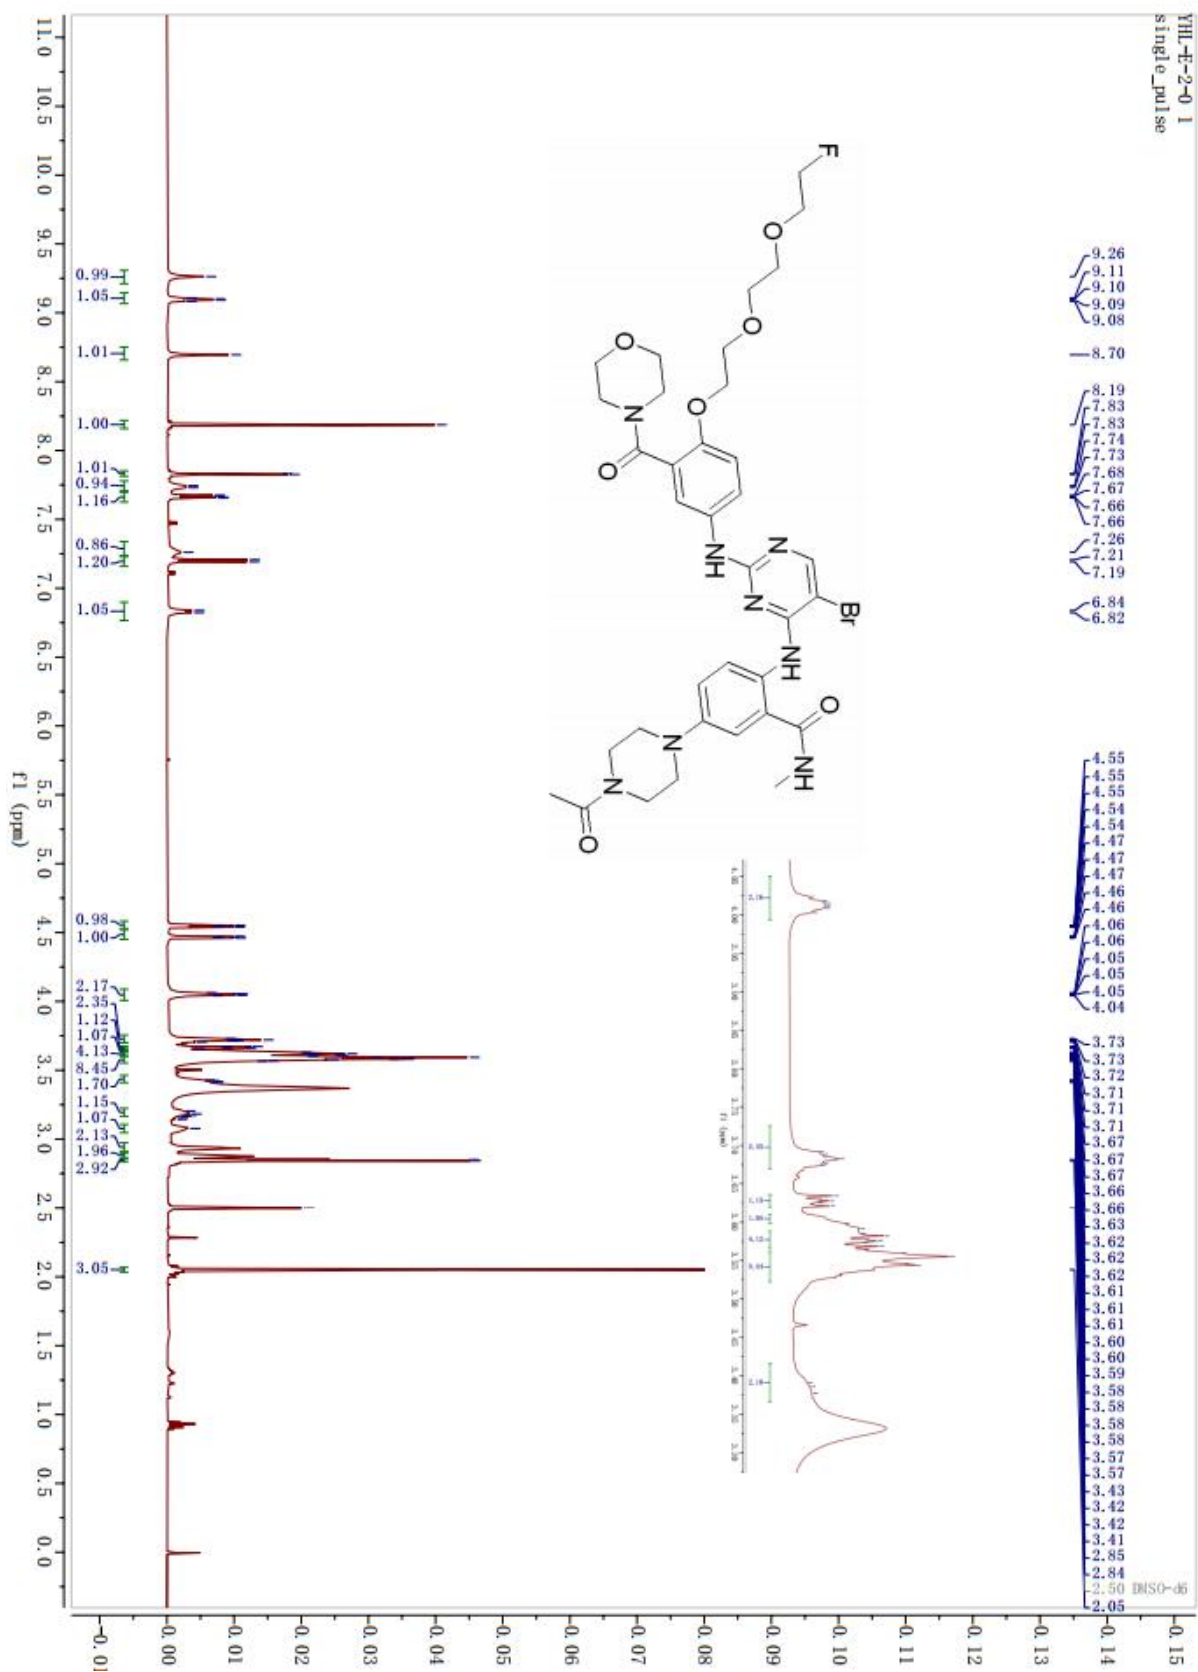

Figure S10  $^1\text{H}$  NMR spectrum of 7d

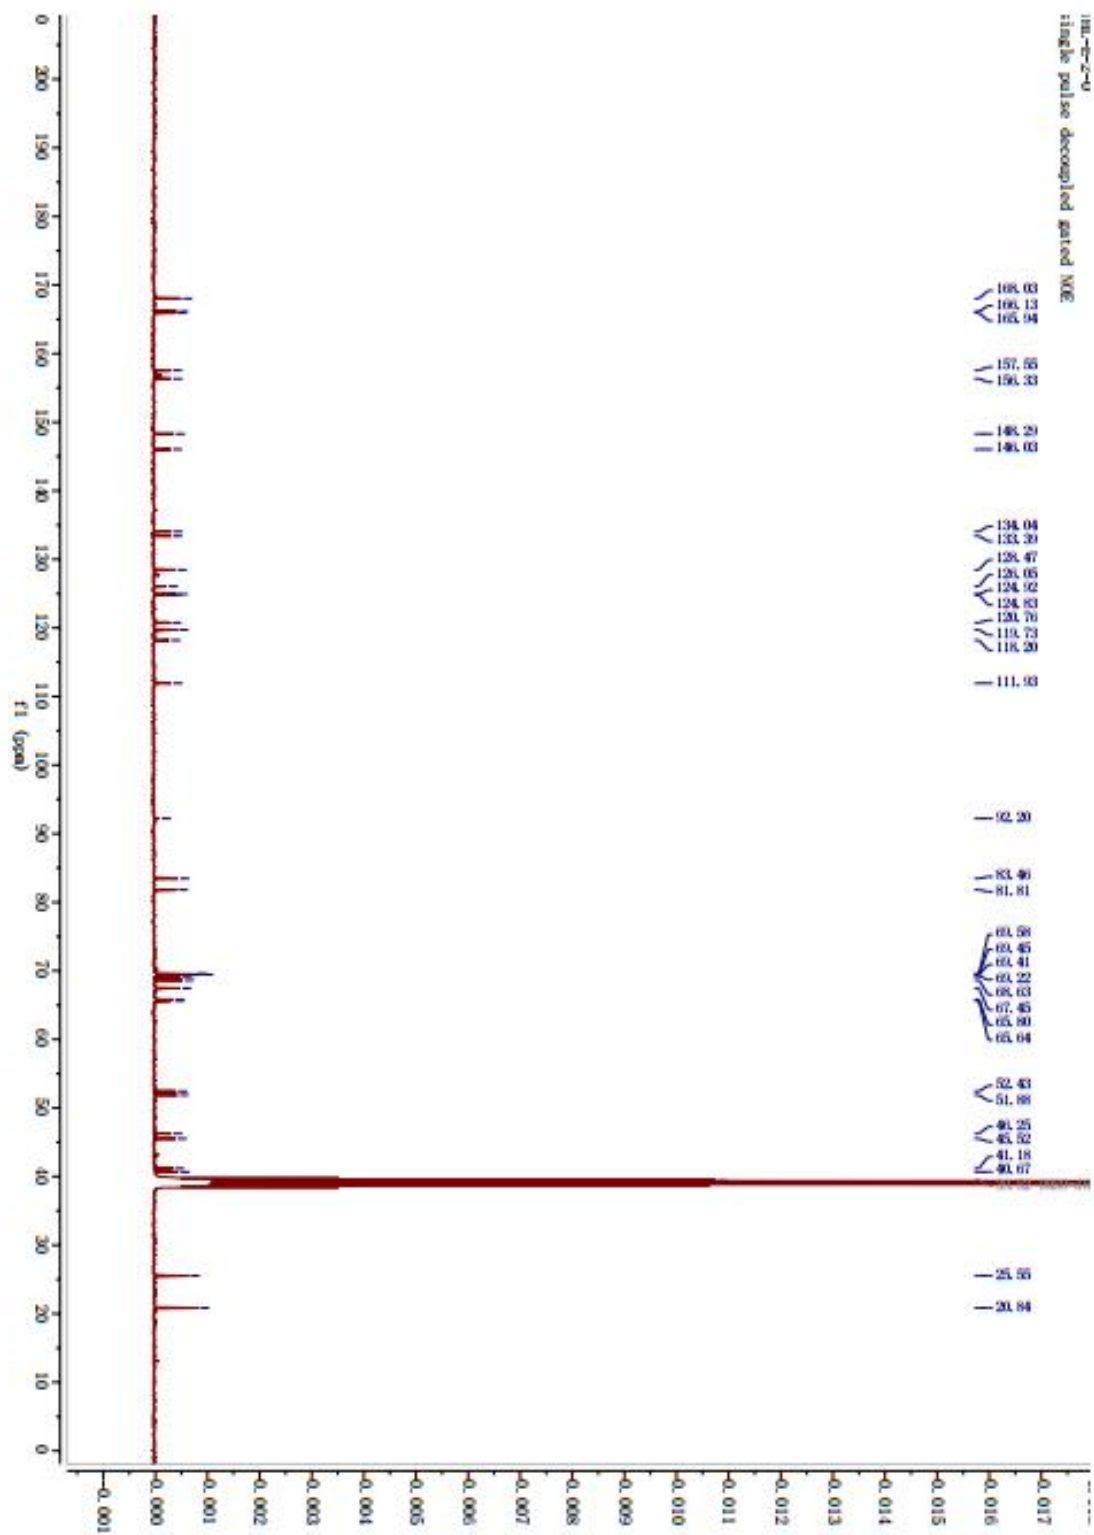

Figure S11  $^{13}\text{C}$  NMR spectrum of **7d**

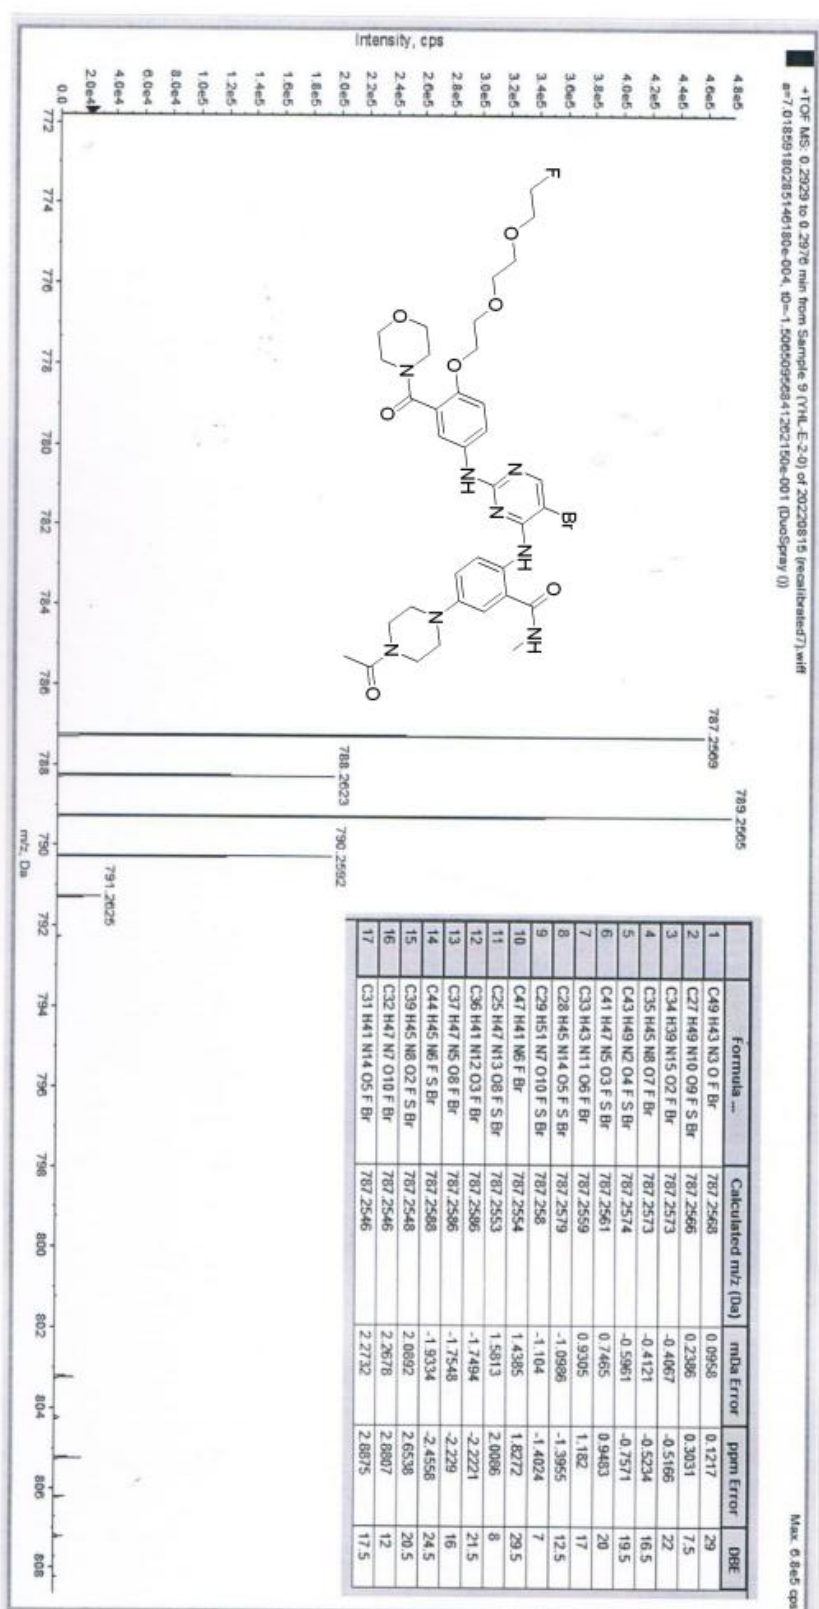

Figure S12 ESI-HRMS spectrum of 7d





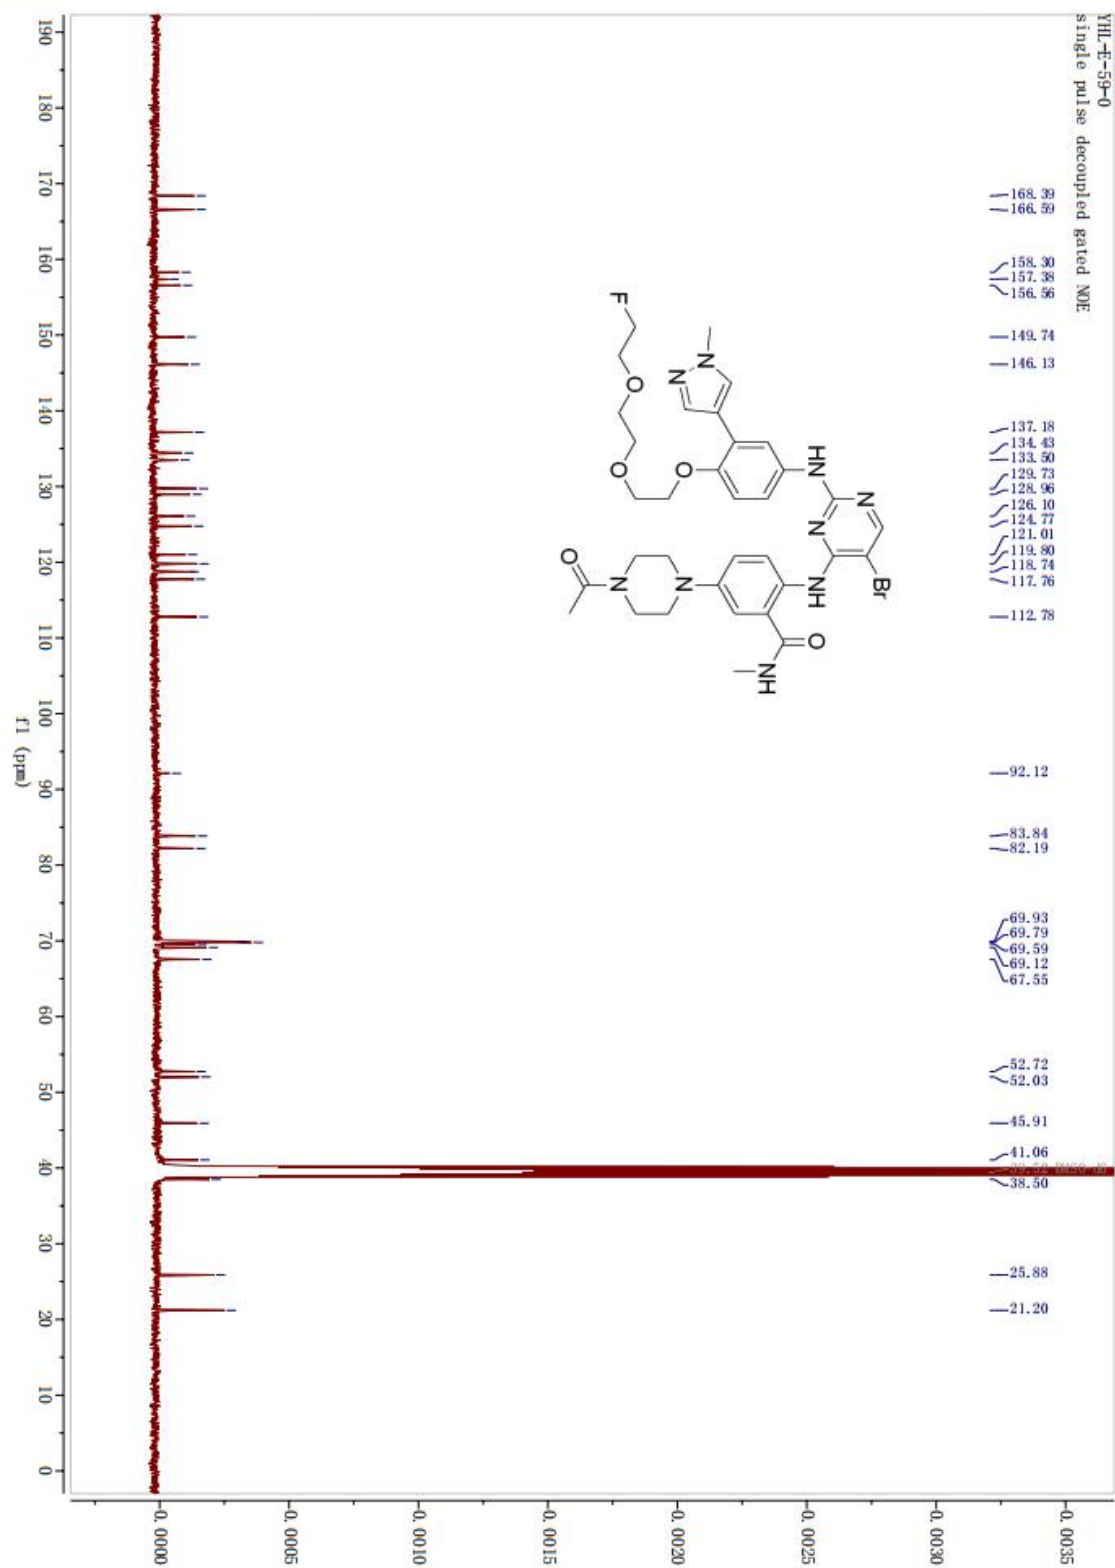

Figure S14  $^{13}\text{C}$  NMR spectrum of 7e



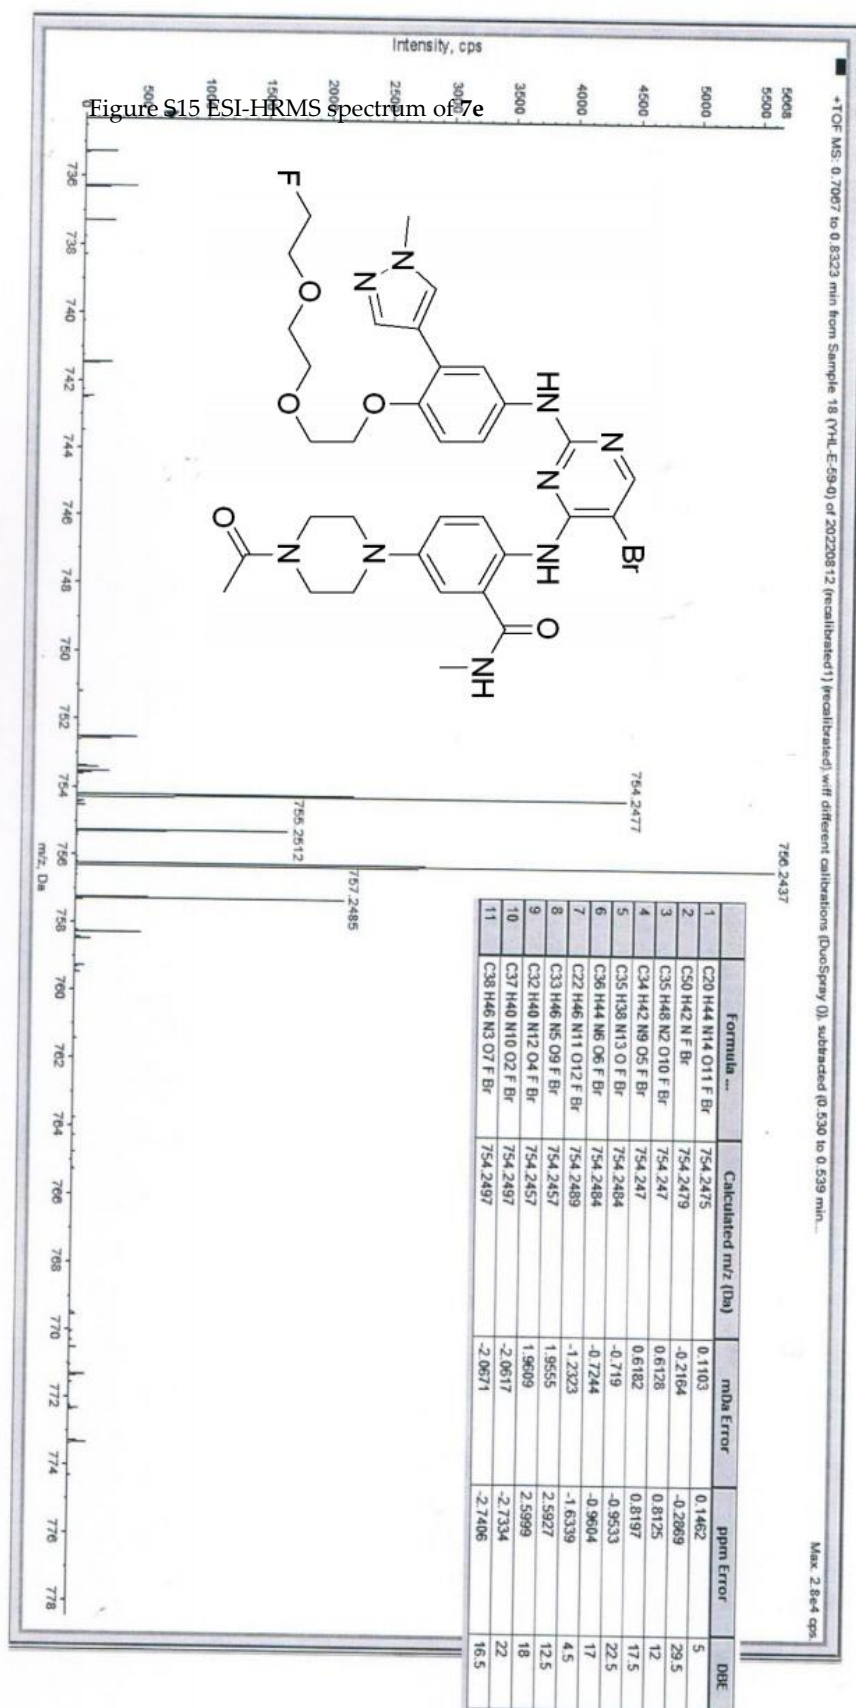

Figure S15 ESI-HRMS spectrum of 7e

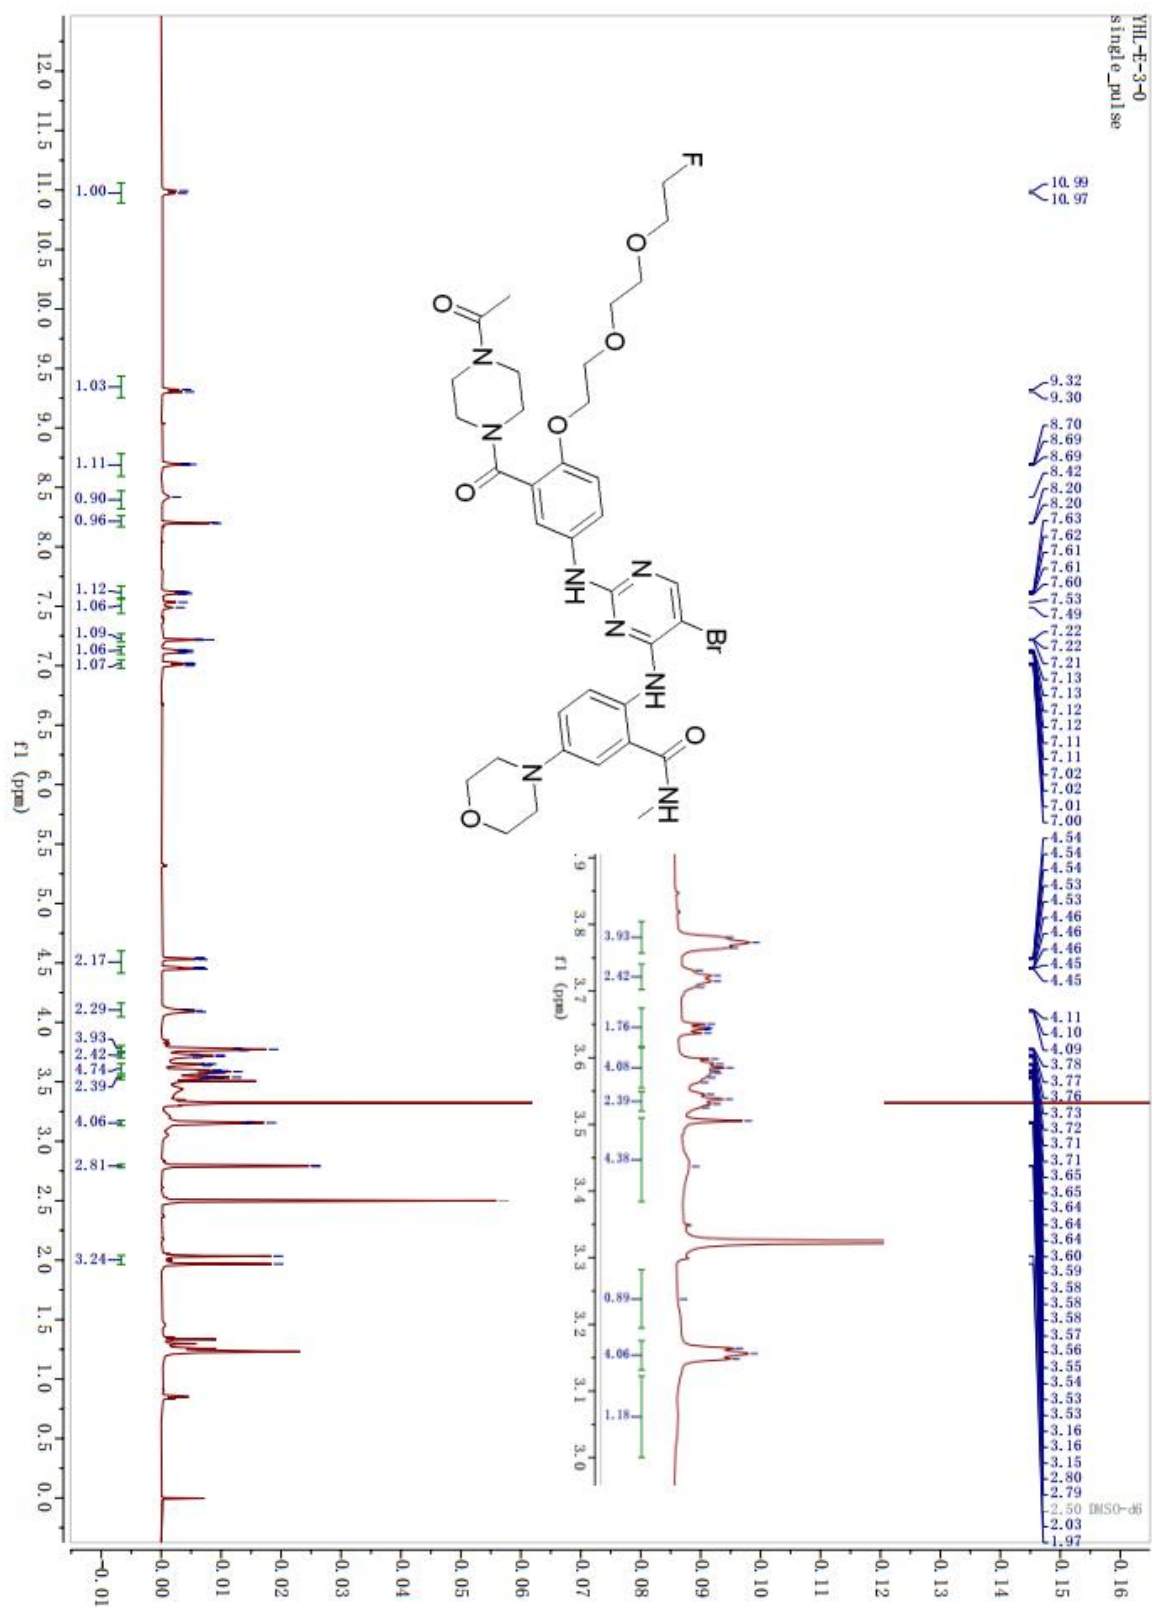

Figure S16  $^1\text{H}$  NMR spectrum of 7f

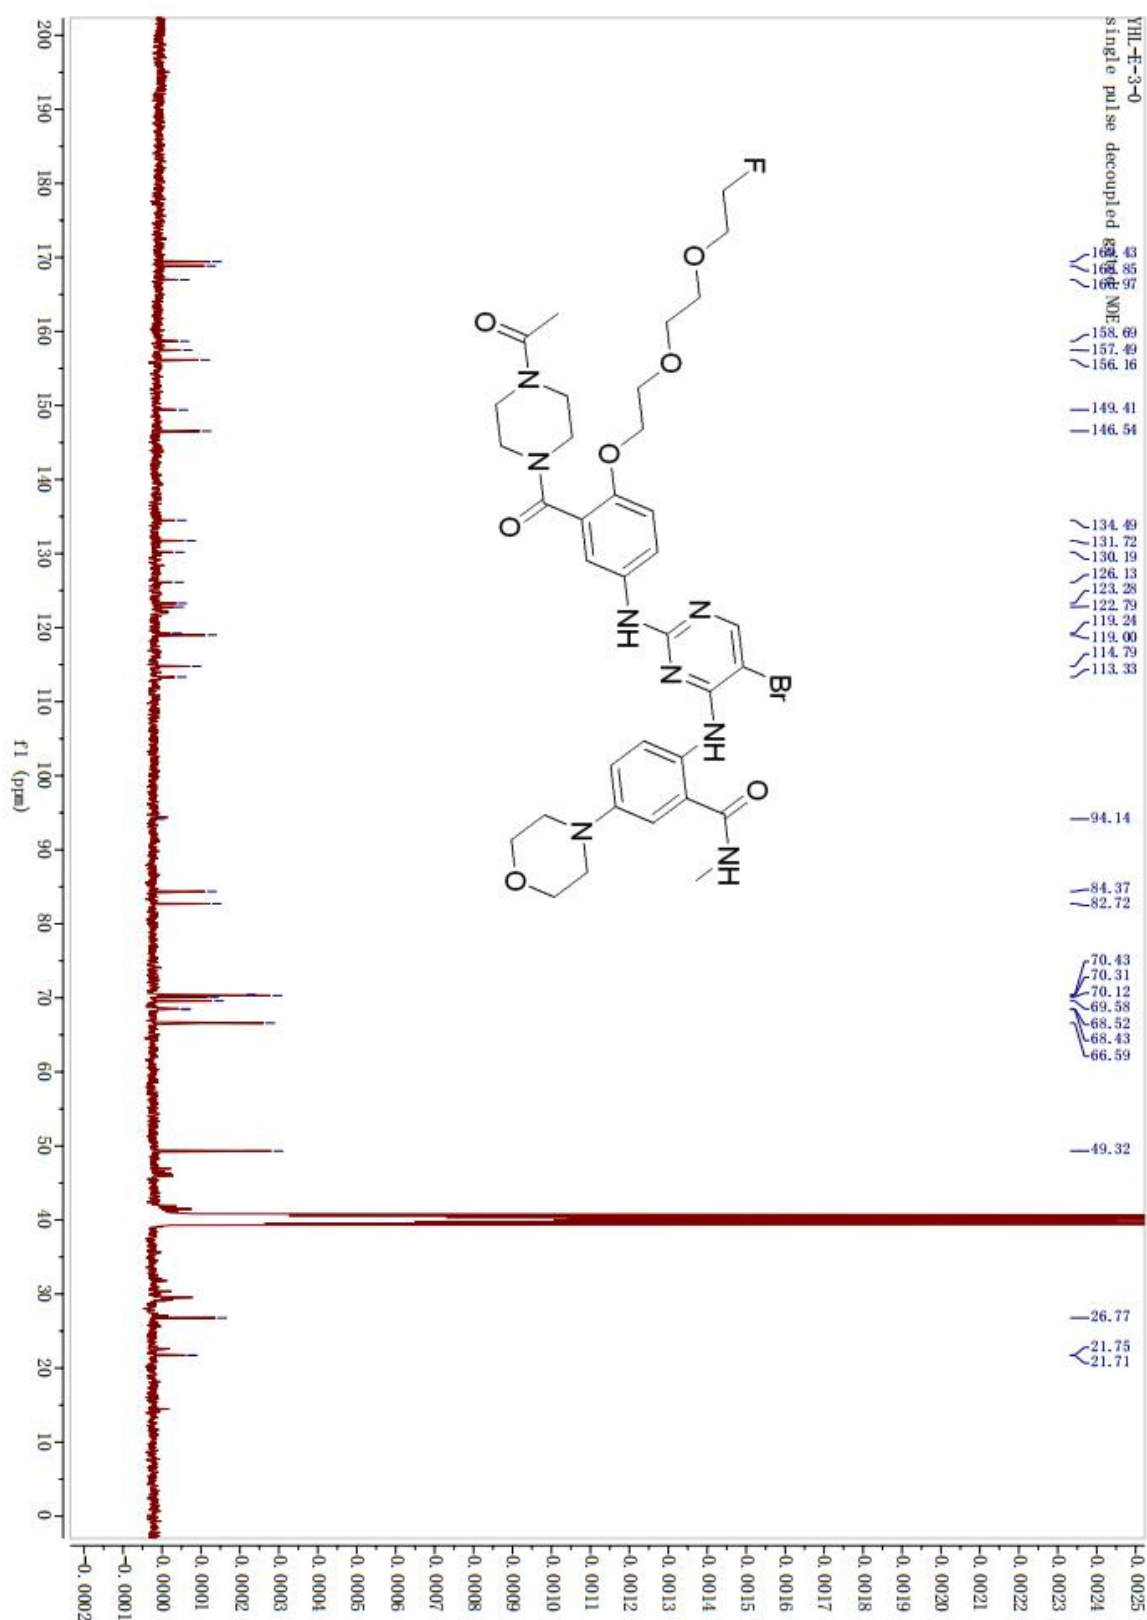

Figure S17  $^{13}\text{C}$  NMR spectrum of 7f

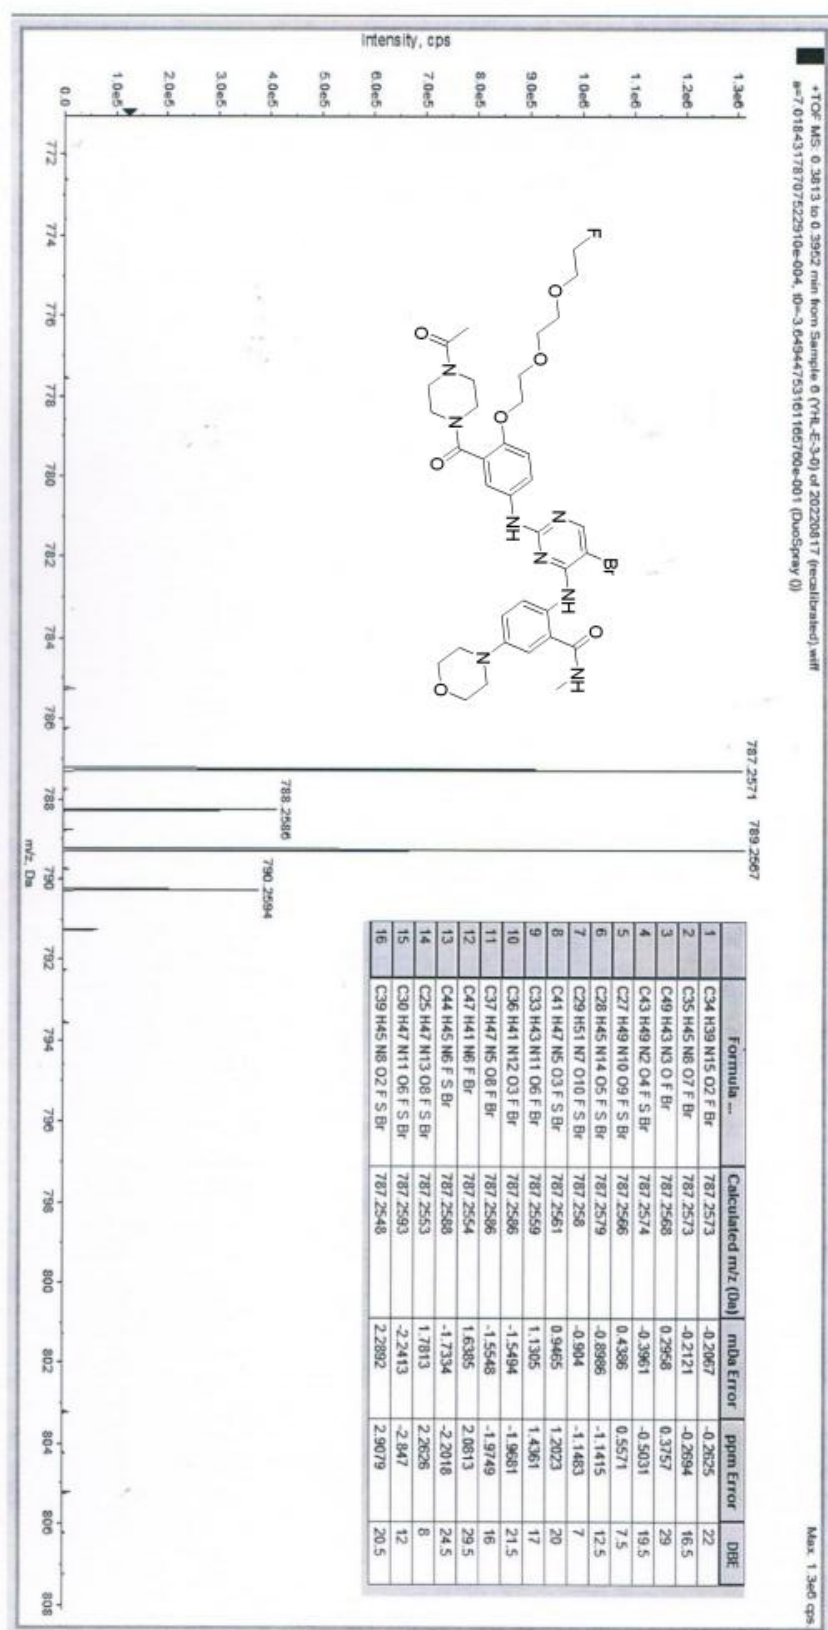

Figure S18 ESI-HRMS spectrum of 7f



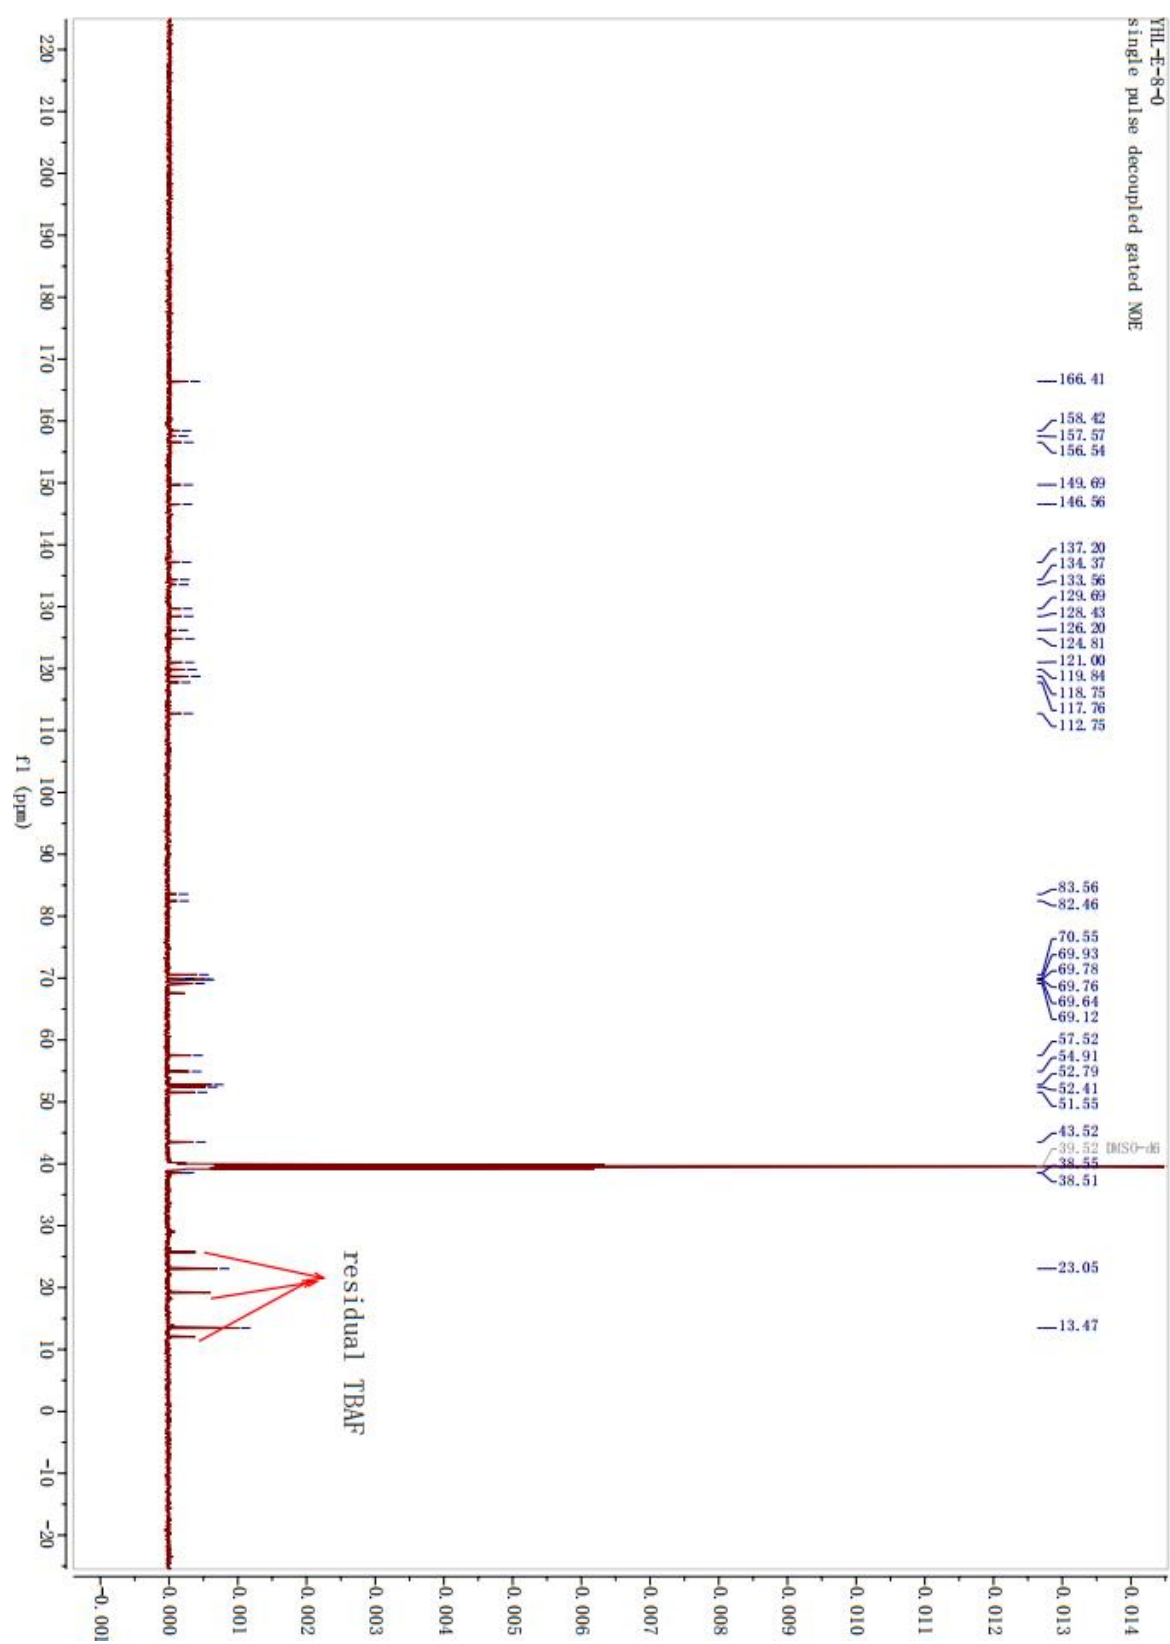

Figure S20  $^{13}\text{C}$  NMR spectrum of **7g**



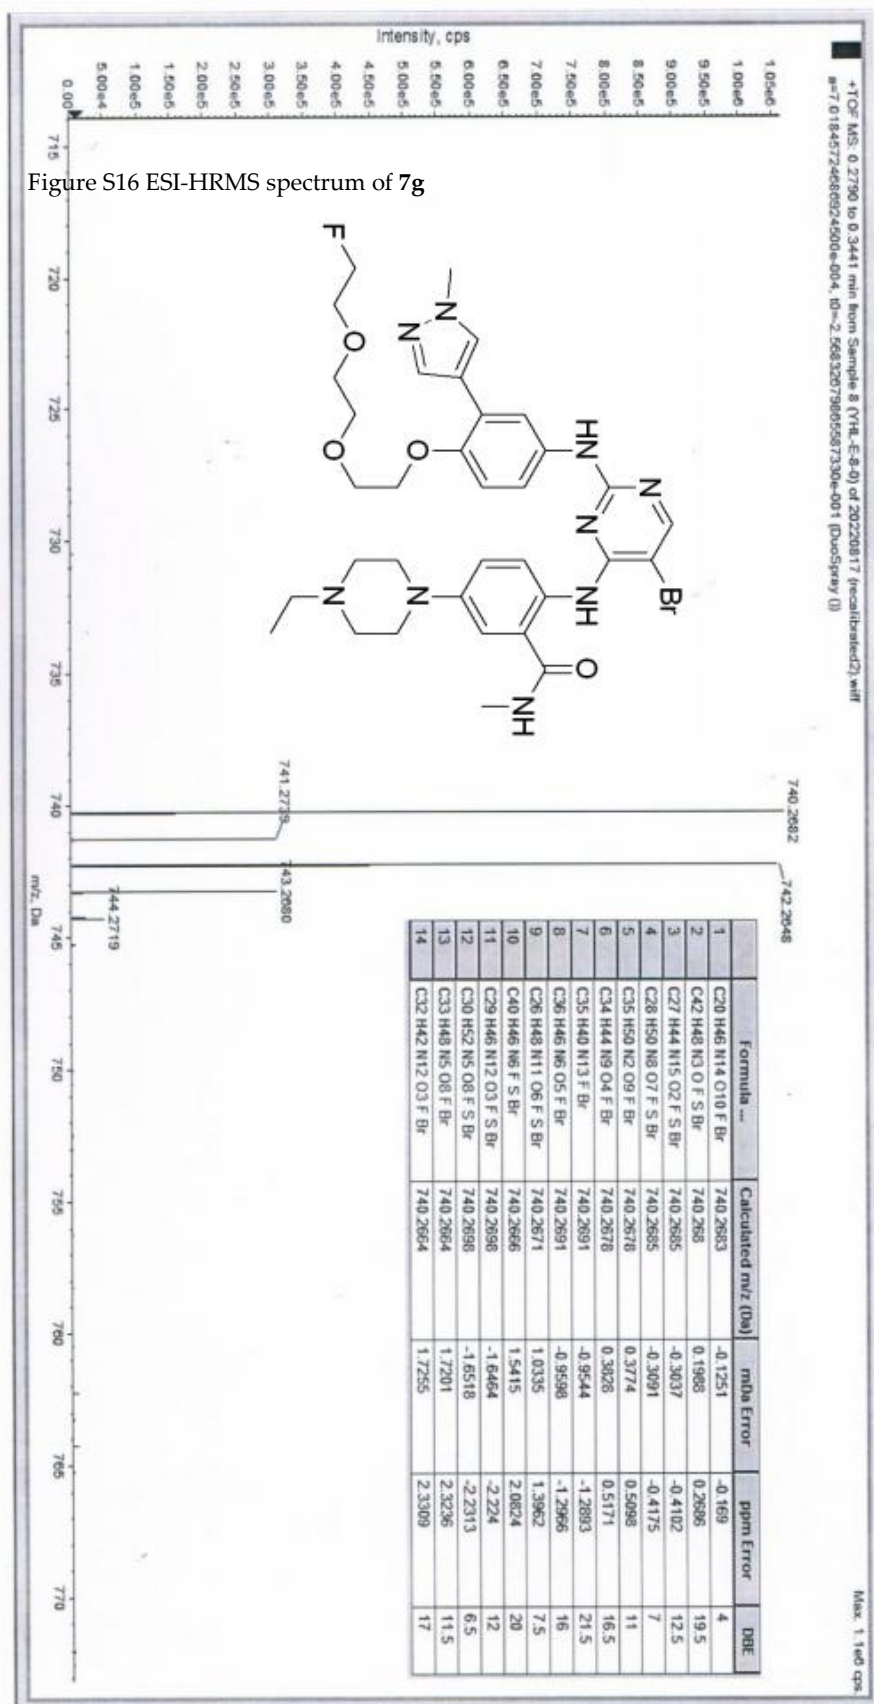

Figure S21 ESI-HRMS spectrum of 7g
